# Supplementary material for: Astaxanthin Prevents Atrophy in Slow Muscle Fibers by Inhibiting Mitochondrial Reactive Oxygen Species via a Mitochondria-Mediated Apoptosis Pathway
Source: PubMed Central journal article supplement (PMC7912339; doi:10.3390/nu13020379), 2021-01-26
Supplement: nutrients-13-00379-s001.pdf [file nutrients-13-00379-s001.pdf]

**Supplementary Table S1** Composition of the experimental diets

|                                   | ND     | AX     |
|-----------------------------------|--------|--------|
| $\alpha$ -corn starch (g)         | 45.4   | 45.4   |
| Sucrose (g)                       | 22.8   | 22.8   |
| Casein (g)                        | 20.0   | 20.0   |
| Cystine (g)                       | 0.3    | 0.3    |
| Soybean oil (g)                   | 5.0    | 4.8    |
| Bio Astin SCE (g)                 | 0      | 0.2    |
| Vitamin mix (g)                   | 1.0    | 1.0    |
| Mineral mix including choline (g) | 3.5    | 3.5    |
| Cellulose (g)                     | 2.0    | 2.0    |
| Tertiary butylhydroquinone (g)    | 0.0014 | 0.0014 |

Bio Astin SCE contains 10% astaxanthin derived from *Haematococcus pluvialis*. ND, normal diet; AX, astaxanthin-supplemented diet.

**Supplementary Table S2** Primer sets used in this study

| Target gene  | Sequence                        |
|--------------|---------------------------------|
| AMPK alpha-1 | F 5'- TCAGTTCCTGGAGAAAGATGG-3'  |
|              | R 5'- TTATGTCCGGTCAACTCGTG-3'   |
| PPAR gamma   | F 5'- CCCATCGAGGACATCCAA-3'     |
|              | R 5'- CACGTGCTCTGTGACGATCT-3'   |
| Ckmt 2       | F 5'- TACTCACGGGCAGTTTGATA-3'   |
|              | R 5'- CACATTCTCCACCTCCCTTC-3'   |
| Ucp2         | F 5'- GCGTTCTGGGTACCATCCTA-3'   |
|              | R 5'- AGAGTCGTAGAGGCCAATGC-3'   |
| Atp5g1       | F 5'- CCATCTAAGCAGCCTTCCTG-3'   |
|              | R 5'- GATCCAGCCACACCAACTGT-3'   |
| Ndufaf2      | F 5'- AGGCATGAGCTGGTGGTC-3'     |
|              | R 5'- TCTGCCCTCTCCAGTTCTTG-3'   |
| Sdhb         | F 5'- GGAGGGCAAGCAACAGTATC-3'   |
|              | R 5'- CTTGTCTCCGTTCCACCAGT-3'   |
| GAPDH        | F 5'- ACCCAGAAGACTGTGGATGG -3'  |
|              | R 5'- TTCAGCTCTGGGATGACCTT - 3' |

F, forward primer; R, reversed primer; AMPK, Adenosine 5'-monophosphate (AMP)-activated protein kinase; PPAR, peroxisome proliferator-activated receptor; Ckmt, creatine kinase in mitochondrial; UCP, uncoupling protein; Atp5g1, ATP synthase, H<sup>+</sup> transporting, mitochondrial F<sub>0</sub> complex, subunit C1; Ndufaf2, NADH-ubiquinone oxidoreductase complex assembly factor; Sdhb, succinate dehydrogenase complex, subunit B; GAPDH, glyceraldehyde-3-phosphate dehydrogenase.
